# Supplementary material for: Gene expression and molecular pathway activation signatures of MYCN-amplified neuroblastomas
Source: PubMed Central journal article supplement (PMC5663553; doi:10.18632/oncotarget.19662), 2017-07-28
Supplement: oncotarget-08-83768-s001.pdf [file oncotarget-08-83768-s001.pdf]

## **Gene expression and molecular pathway activation signatures of *MYCN*-amplified neuroblastomas**

### **SUPPLEMENTARY MATERIALS**

**Supplementary Dataset 1: TARGET / MAQC project data gene expression markers - Contains gene expression markers for TARGET and MAQC data on separate tabs; contains AUC value and up/down regulation status in amplified and non-amplified patients relative to the mean transcriptome for each marker gene.**

See Supplementary File 1

**Supplementary Dataset 2: TARGET / MAQC project data pathway activation markers - Contains pathway activation markers for TARGET and MAQC data on separate tabs; contains AUC value and up/down regulation status in amplified and non-amplified patients relative to the mean transcriptome for each marker pathway.**

See Supplementary File 2

**Supplementary Dataset 3: Intersection of TARGET and MAQC gene markers - Contains gene id and AUC values corresponding to their performance in TARGET and MAQC data.**

See Supplementary File 3

**Supplementary Dataset 4: DAVID clustering for intersecting gene markers - This table is formatted as standard DAVID functional annotation clustering output file.**

See Supplementary File 4

**Supplementary Dataset 5: Composition of MYCN amplification pathway - Detailed information on genes contained in newly constructed MYCN amplification pathway.**

See Supplementary File 5

**Supplementary Dataset 6: Information regarding Custom Array patients - Contains patient ID, MYCN status, 1p / 11q loss status and age at manifestation in months.**

See Supplementary File 6

**Supplementary Dataset 7: GO terms linked with newly constructed MYCN amplification pathway - The major Gene Ontology terms statistically significantly linked with the MYCN amplification pathway are the following: G2/M checkpoint regulation and DNA damage response, p53 signaling pathway, cell cycle progression, maintaining dopaminergic/adrenergic/serotonergic/glutamatergic synapses, phospholipid signaling, gene signatures associated with prostate, pancreatic, thyroid, renal, bladder, non-small cell lung cancers, acute myeloid and chronic myeloid leukemia, melanoma, glioma, central carbon metabolism in cancer, regulation of PI3K signaling, MAPK signaling, Ras signaling, tyrosine phosphatase activity.**

See Supplementary File 7

**Supplementary Dataset 8: Results for the 378 molecular pathways obtained for each sample - Includes all three datasets (TARGET, MAQC, Custom Array with different controls).**

See Supplementary File 8
